# Supplementary material
Source: PubMed Central journal article supplement (PMC2677617)
Supplement: rspb20090268s25.pdf [file rspb20090268s25.pdf]

**Electronic supplementary material** – Watts et al., Post-weaning maternal effects and the evolution of female dominance in the spotted hyena

**Table S1.** Indicators of intensity of feeding competition among large carnivores that feed in groups on medium- and large-bodied ungulates. Wherever possible all data were obtained from a single study.

|                   | Maximum food consumption rate (g/min) | Social group size | Feeding group size | References                                                |
|-------------------|---------------------------------------|-------------------|--------------------|-----------------------------------------------------------|
| African wild dogs | 1340                                  | 5-12              | 5-12               | Creel & Creel (2002); S. Creel, personal communication    |
| Lions             | 83                                    | 17                | 5.2                | Schaller (1972)                                           |
| Spotted hyenas    | 1250                                  | 50-60             | 8                  | Holekamp et al. (1997); Smith et al. (2008); Kruuk (1972) |
| Wolves            | 1100                                  | 9-10              | 9-10               | Schmidt & Mech (1997); Wilmers & Stahler (2002)           |

**References cited in table S1**

- Creel, S. & Creel, N. M. 2002 *The African Wild Dog: Behavior, Ecology, and Conservation*. Princeton, N.J.: Princeton University Press.
- Holekamp, K. E., Smale, L., Berg, R. & Cooper, S. M. 1997 Hunting rates and hunting success in the spotted hyena (*Crocuta crocuta*). *J. Zool.* **242**, 1-15.
- Kruuk, H. 1972 *The Spotted Hyena: A Study of Predation and Social behavior*. Chicago: University of Chicago Press.
- Schaller, G. B. 1972 *The Serengeti Lion*. Chicago: University of Chicago Press.
- Schmidt, P. A. & Mech, L. D. 1997 Wolf pack size and food acquisition. *Am. Nat.* **150**, 513-517.
- Smith, J. E., Kolowski, J. M., Graham, K. E., Dawes, S. E. & Holekamp, K. E. 2008 Social and ecological determinants of fission-fusion dynamics in the spotted hyaena. *Anim. Behav.* **76**, 619-636 (doi:10.1016/j.anbehav.2008.05.001).
- Wilmers, C. C. & Stahler, D. R. 2002 Constraints on active-consumption rates in gray wolves, coyotes, and grizzly bears. *Can. J. Zool.* **80**, 1256-1261 (doi:10.1139/z02-112).
