# Supplementary material
Source: PubMed Central journal article supplement (PMC2677617)
Supplement: rspb20090268s26.pdf [file rspb20090268s26.pdf]

**Electronic supplementary material** – Watts et al., Post-weaning maternal effects and the evolution of female dominance in the spotted hyena

**Table S2.** Body mass and weaning age of carnivore species.

| Species                         | Adult body mass (kg) | Weaning age (mo) | References <sup>a</sup>     |
|---------------------------------|----------------------|------------------|-----------------------------|
| <b>Canidae</b>                  |                      |                  |                             |
| <i>Canis latrans</i>            | 10.6                 | 3.2              |                             |
| <i>Canis lupus</i>              | 33.1                 | 1.1              |                             |
| <i>Canis mesomelas</i>          | 7.7                  | 2.0              |                             |
| <i>Cerdocyon thous</i>          | 6                    | 3.0              |                             |
| <i>Lycaon pictus</i>            | 22                   | 2.5              |                             |
| <i>Otocyon megalotis</i>        | 3.9                  | 3.4              |                             |
| <i>Vulpes lagopus</i>           | 3.2                  | 0.7              |                             |
| <i>Vulpes vulpes</i>            | 4.1                  | 1.8              |                             |
| <i>Vulpes zerda</i>             | 1.5                  | 2.2              |                             |
| <b>Felidae</b>                  |                      |                  |                             |
| <i>Acinonyx jubatus</i>         | 58.8                 | 3.6              |                             |
| <i>Caracal caracal</i>          | 11.59                | 4.0              |                             |
| <i>Felis chaus</i>              | 6.65                 | 3.3              |                             |
| <i>Felis silvestris</i>         | 4.67                 | 2.8              |                             |
| <i>Leopardus geoffroyi</i>      | 2.2                  | 2.1              |                             |
| <i>Leopardus pardalis</i>       | 11.88                | 6.0              | Murray & Gardner (1997)     |
| <i>Lynx lynx</i>                | 19.3                 | 3.7              |                             |
| <i>Lynx rufus</i>               | 6.2                  | 2.0              |                             |
| <i>Panthera leo</i>             | 155.8                | 7.0              | Pusey & Packer (1994)       |
| <i>Panthera onca</i>            | 86.2                 | 3.8              |                             |
| <i>Panthera pardus</i>          | 52.4                 | 4.6              |                             |
| <i>Panthera tigris</i>          | 161                  | 5.4              |                             |
| <i>Prionailurus bengalensis</i> | 5.5                  | 0.8              |                             |
| <i>Prionailurus viverrinus</i>  | 8.8                  | 1.7              |                             |
| <b>Herpestidae</b>              |                      |                  |                             |
| <i>Cynictus penicillata</i>     | 0.06                 | 1.4              |                             |
| <i>Herpestes javincus</i>       | 0.78                 | 1.0              |                             |
| <i>Suricata suricatta</i>       | 0.73                 | 1.8              |                             |
| <b>Hyaenidae</b>                |                      |                  |                             |
| <i>Crocuta crocuta</i>          | 52                   | 12.8             |                             |
| <i>Hyaena hyaena</i>            | 26.8                 | 11.0             | Kruuk (1976)                |
| <i>Parahyaena brunnea</i>       | 43.9                 | 11.8             |                             |
| <i>Proteles cristata</i>        | 8.34                 | 3.5              | Koehler & Richardson (1990) |

Table S2 (cont'd)

| Species                        | Adult body mass (kg) | Weaning age (mo) | References <sup>a</sup>              |
|--------------------------------|----------------------|------------------|--------------------------------------|
| <b>Mustelidae</b>              |                      |                  |                                      |
| <i>Enhydra lutris</i>          | 28.3                 | 6.0              | Estes (1980)<br>Monson et al. (2000) |
| <i>Gulo gulo</i>               | 11.6                 | 2.3              |                                      |
| <i>Ictonyx striatus</i>        | 0.77                 | 1.8              |                                      |
| <i>Lontra canadensis</i>       | 8.2                  | 3.0              |                                      |
| <i>Lutra lutra</i>             | 8.9                  | 3.7              |                                      |
| <i>Lutrogale perspicillata</i> | 8.78                 | 4.1              |                                      |
| <i>Martes americana</i>        | 0.87                 | 1.5              |                                      |
| <i>Martes pennanti</i>         | 3.75                 | 1.5              |                                      |
| <i>Martes zibellina</i>        | 1.18                 | 1.6              |                                      |
| <i>Meles meles</i>             | 11.6                 | 3.1              |                                      |
| <i>Mustela altaica</i>         | 0.19                 | 1.8              |                                      |
| <i>Mustela frenata</i>         | 2.33                 | 1.0              |                                      |
| <i>Mustela lutreola</i>        | 0.59                 | 2.3              |                                      |
| <i>Mustela nivalis</i>         | 0.08                 | 1.0              |                                      |
| <i>Mustela sibirica</i>        | 0.57                 | 1.8              |                                      |
| <i>Poecilogale albinucha</i>   | 0.3                  | 2.5              |                                      |
| <i>Taxidea taxus</i>           | 4.05                 | 1.4              |                                      |
| <b>Procyonidae</b>             |                      |                  |                                      |
| <i>Bassariscus astutus</i>     | 0.87                 | 3.9              |                                      |
| <i>Procyon lotor</i>           | 6.4                  | 3.9              |                                      |
| <b>Ursidae</b>                 |                      |                  |                                      |
| <i>Ailuropoda melanoleuca</i>  | 135                  | 18.0             | Zhu et al. (2001)                    |
| <i>Ursus americanus</i>        | 110.5                | 5.5              |                                      |
| <i>Ursus arctos</i>            | 298.5                | 23.9             |                                      |
| <i>Ursus maritimus</i>         | 365                  | 28.0             | DeMaster & Stirling (1981)           |
| <i>Ursus thibetanus</i>        | 103.8                | 3.9              |                                      |
| <b>Viverridae</b>              |                      |                  |                                      |
| <i>Arctictis binturong</i>     | 13                   | 1.8              |                                      |
| <i>Civettictis civetta</i>     | 12.02                | 4.6              | Ray (1995)                           |
| <i>Genetta genetta</i>         | 1.9                  | 4.0              | Lariviere & Calzada (2001)           |
| <i>Genetta tigrina</i>         | 2.06                 | 1.8              |                                      |
| <i>Hemigalus derbyanus</i>     | 0.83                 | 2.3              |                                      |

<sup>a</sup>Data are taken from Gittleman (1986) unless otherwise noted.

## References cited in table S2

- DeMaster, D. P., and I. Stirling. 1981. *Ursus maritimus*. *Mammalian Species* **145**, 1-7.
- Estes, J. A. 1980. *Enhydra lutris*. *Mammalian Species* **133**, 1-8.
- Gittleman, J. L. 1986. Carnivore life history patterns: Allometric, phylogenetic, and ecological associations. *Am. Nat.* **127**, 744-771.
- Koehler, C. E., and P. R. K. Richardson. 1990. *Proteles cristatus*. *Mammalian Species* **363**, 1-6.
- Kruuk, H. 1976. Feeding and social behaviour of the striped hyaena (*Hyaena vulgaris* Desmarest). *East Afr. Wild. J.* **14**, 91-111.
- Monson, D. H., J. A. Estes, J. L. Bodkin, and D. B. Siniff. 2000. Life history plasticity and population regulation in sea otters. *Oikos* **90**, 457-468.
- Murray, J. L., and G. L. Gardner. 1997. *Leopardus pardalis*. *Mammalian Species* **548** 1-10.
- Pusey, A. E., and C. Packer. 1994. Non-offspring nursing in social carnivores: minimizing the costs. *Behav. Ecol.* **5**, 362-374.
- Ray, J. C. 1995 *Civettictis civetta*. *Mammalian Species* **488**, 1-7.
- Zhu, X., Lindburg, D. G., Pan, W., Forney, K. A. & Wang, D. 2001. The reproductive strategy of giant pandas (*Ailuropoda melanoleuca*): infant growth and development and mother-infant relationships. *J. Zool.* **253**, 141-155.
